# Supplementary material for: Locked Nucleic Acid Oligonucleotides Facilitate RNA•LNA-RNA Triple-Helix Formation and Reduce MALAT1 Levels
Source: MDPI journal article supplement (doi:10.3390/ijms25031630), 2024-01-28
Supplement: s1 [file s1]

# SUPPLEMENTARY MATERIAL

## Locked Nucleic Acid Oligonucleotides Facilitate RNA•LNA-RNA Triple-Helix Formation and Reduce *MALAT1* Levels

Krishna M. Shivakumar, Gowthami Mahendran, and Jessica A. Brown

| Table S1. Oligonucleotides and RNAs used in this study.                                                                                          |                                                                                                                         |
|--------------------------------------------------------------------------------------------------------------------------------------------------|-------------------------------------------------------------------------------------------------------------------------|
| Synthesized oligonucleotides                                                                                                                     |                                                                                                                         |
| R15                                                                                                                                              | 5' - AAAAAAAAAAGCAAAA - 3'                                                                                              |
| L15                                                                                                                                              | 5' - [+A] [+A] [+A] [+A] [+A] [+A] [+A] [+A] [+A] [+G] [+C] [+A] [+A] [+A] [+A] - 3'                                    |
| PS-L15                                                                                                                                           | 5' - [+A] * [+G] * [+C] * [+A] * [+A] * [+A] * [+A] - 3' |
| A <sub>28</sub>                                                                                                                                  | 5' - AAAAAAAAAAAAAAAAAAAAAAAAAAAAAA - 3'                                                                                |
| <i>In vitro</i> transcribed RNAs                                                                                                                 |                                                                                                                         |
| <i>MALAT1</i> SL                                                                                                                                 | 5' - GGAAGGUUUUUCUUUCCUGAGAAAACAACACGUUUU<br>GUUUUCUCAGGUUUUGCUUUUUGGCCUUUU - 3'                                        |
| <i>MALAT1</i> triple helix                                                                                                                       | 5' - GGAAGGUUUUUCUUUCCUGAGAAAACAACACGUUUU<br>GUUUUCUCAGGUUUUGCUUUUUGGCCUUUUUCUAGCUUAA<br>AAAAAAAAAAGCAAAA - 3'          |
| <i>MENβ</i> SL                                                                                                                                   | 5' - AGGUGUUUCUUUUACUGAGUGCAGCCCAUGGCCGCACU<br>CAGGUUUUGCUUUUCACCUUCC - 3'                                              |
| <i>MENβ</i> triple helix                                                                                                                         | 5' - AGGUGUUUCUUUUACUGAGUGCAGCCCAUGGCCGCACU<br>CAGGUUUUGCUUUUCACCUUCCCAUCUGUGAAAGAGUGAGCAGGAAA<br>AAGCAAAA - 3'         |
| KHSV <i>PAN</i> ENE                                                                                                                              | 5' - GGCUGGGUUUUUCCUUGUUCGCACCGGACACCUCAGU<br>GACCAGACGGCAAGGUUUUUAUCCAGUUCGUUU - 3'                                    |
| <i>TWIF1</i> dENE                                                                                                                                | 5' - GGCUGUACUCUUUUCUUUGUCAUGGUUUUCUCAAUA<br>UGAGUUUUUACAUGACAAAGUUUUUAACGAGGCAGCA - 3'                                 |
| The “+” sign inside a square bracket [+] indicates locked nucleic acid modification, whereas the asterisk (*) denotes phosphorothioate backbone. |                                                                                                                         |

| <b>Table S2.</b> Primers used for RT-qPCR experiments. |                                                                                      |
|--------------------------------------------------------|--------------------------------------------------------------------------------------|
| <i>MALAT1</i>                                          | Forward: 5' -GATCTAGCACAGACCCTTCAC-3'<br>Reverse: 5' -CGACACCATCGTTACCTTGA-3'        |
| <i>MEN<math>\beta</math></i>                           | Forward: 5' -GTGTCCACAGGTCTTAGATTCC-3'<br>Reverse: 5' -TCTGTGTAGTAGGGTGGGATAG-3'     |
| <i>HOTAIR</i>                                          | Forward: 5' -GGTAGAAAAAGCAACCACGAAGC-3'<br>Reverse: 5' -ACATAAACCTCTGTCTGTGAGTGCC-3' |
| <i>U6 snRNA</i>                                        | Forward: 5' -CTCGCTTCGGCAGCACA-3'<br>Reverse: 5' -AACGCTTCACGAATTTGCGT-3'            |

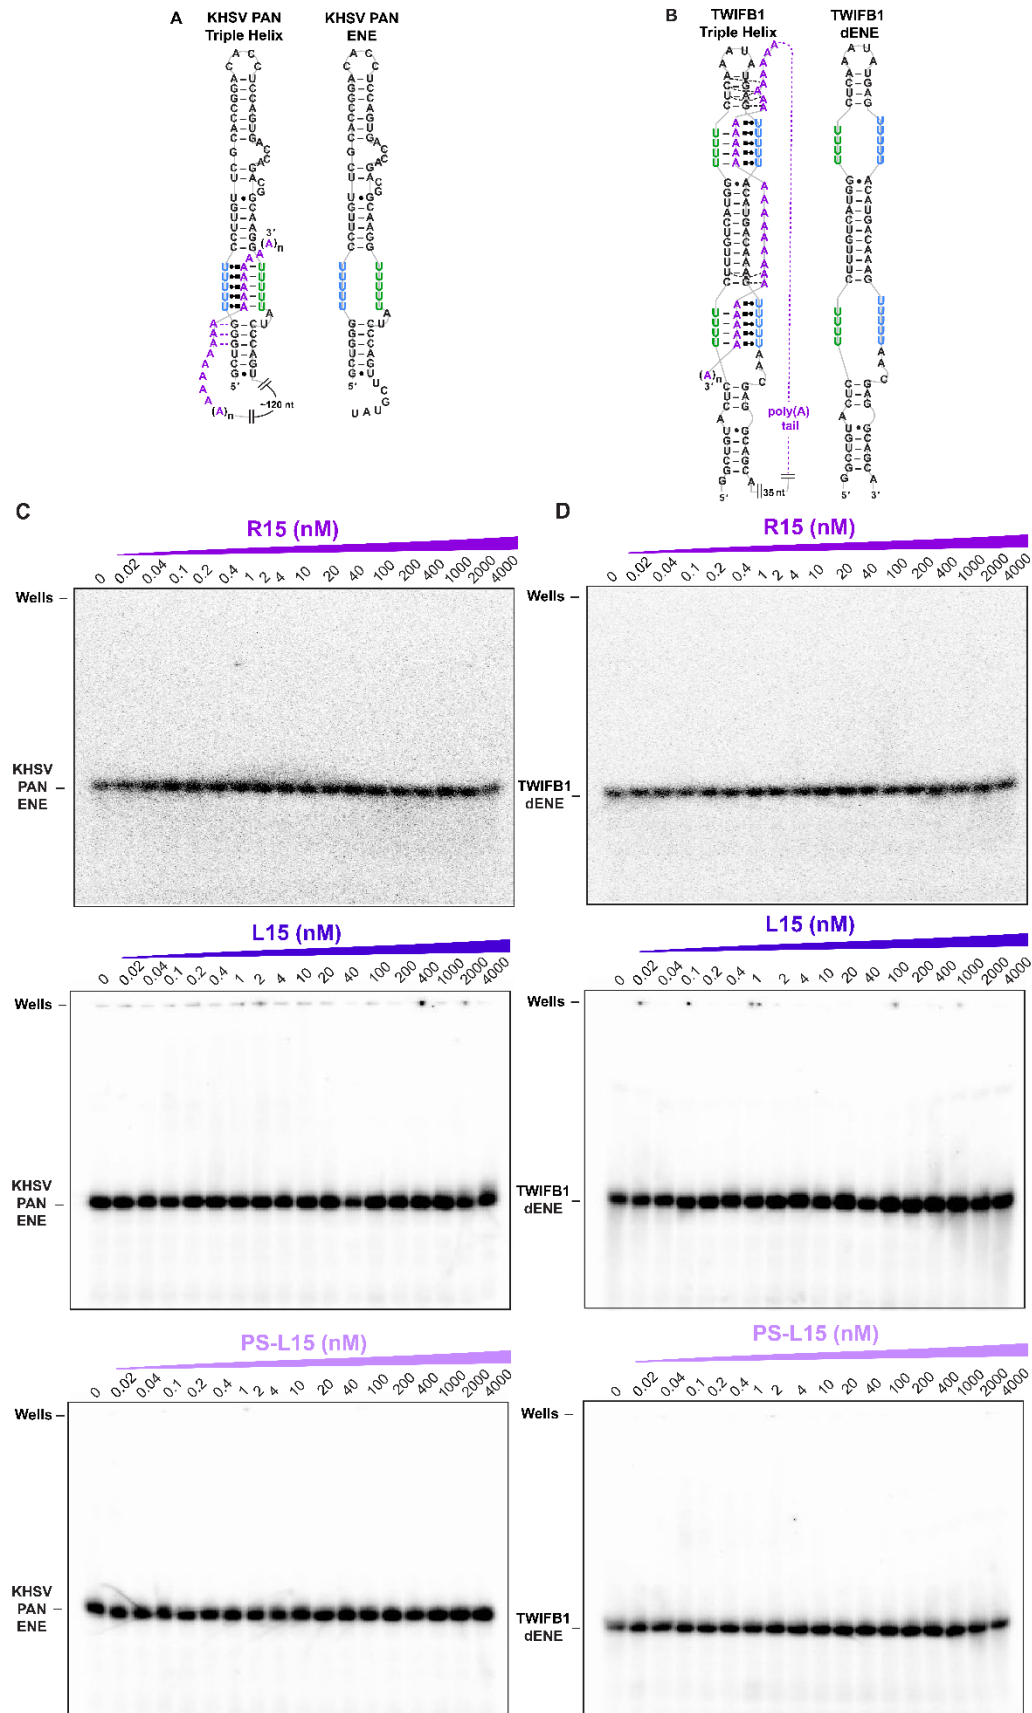

**Figure S1.** EMSA for R15, L15 and PS-L15 not binding to the Kaposi's sarcoma-associated herpesvirus (KHSV) *PAN* ENE and mRNA element from *Oryza sativa* hAT-type DNA transposon *TWIFBIG1* dENE (*TWIFB1* dENE) RNAs [1,2]. Schematic diagrams of (A) KHSV *PAN* triple helix and its ENE, (B) rice transposase *TWIFB1* triple helix and its dENE. The Watson-Crick and Hoogsteen interactions are represented by a solid line (|) and Leontis-Westhof notation (●■) [3], respectively. Representative gel images for R15, L15 and PS-L15 titrated against (C) KHSV *PAN* ENE and (D) *TWIFB1* dENE.

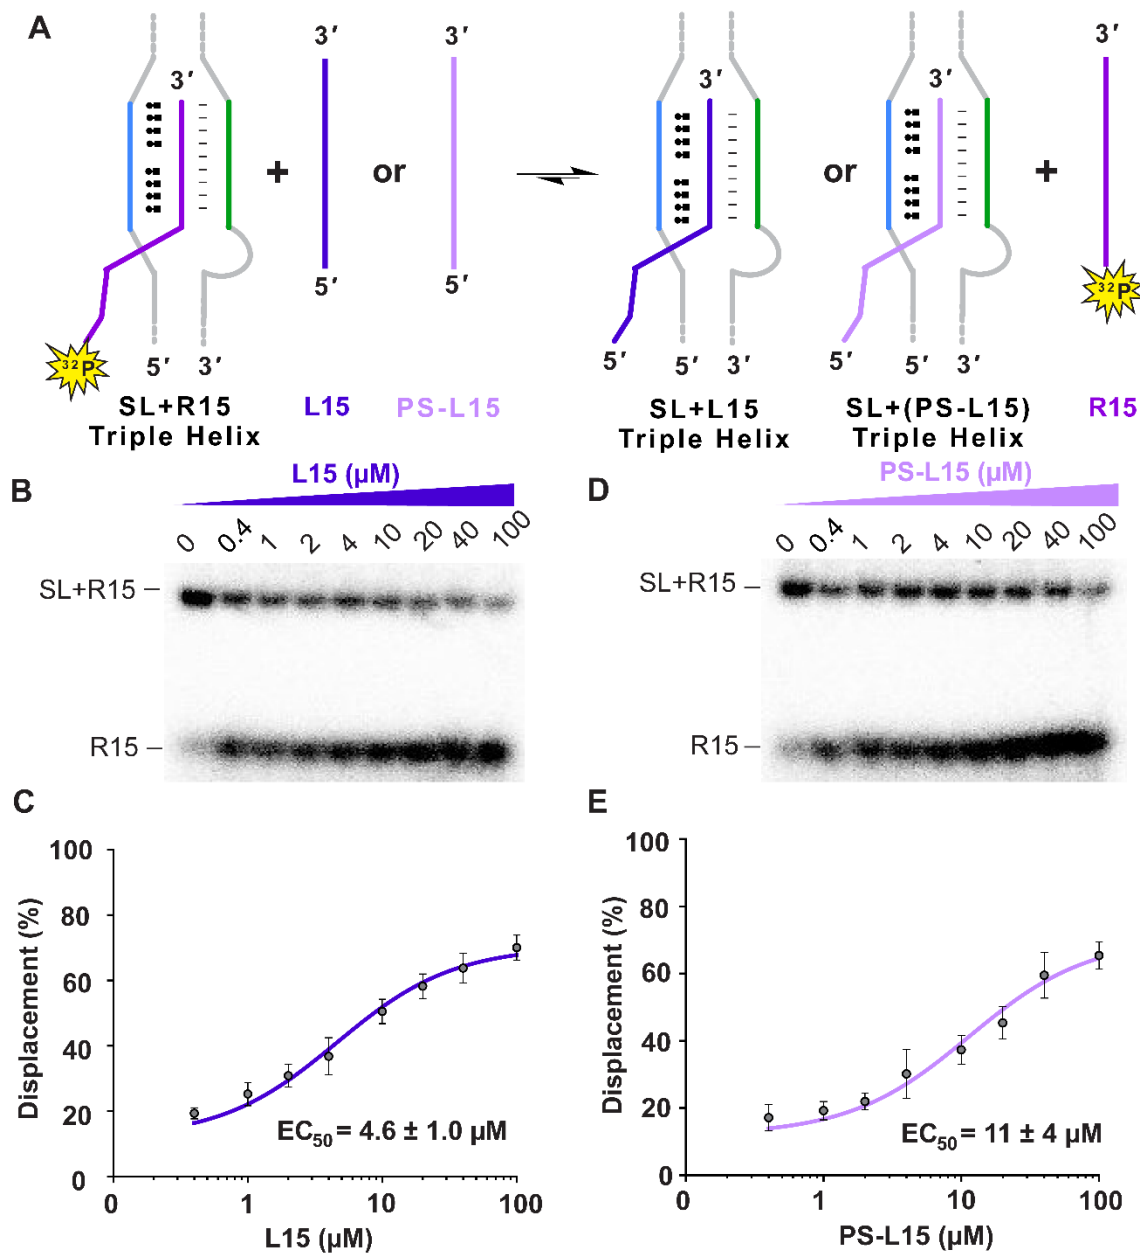

**Figure S2.** Competitive EMSA for the LNAs (L15 and PS-L15) displacing RNA (R15) from *MENβ* SL+R15 complex. (A) Cartoon schematic showing the displacement of 5'-[<sup>32</sup>P]-radiolabeled R15 (purple) from SL+R15 triple helix by L15 (dark purple) or PS+L1 (light purple) to form SL+L15 or SL+(PS-L15) complexes. (B, D) Representative gel images and (C, E) binding curves for the displacement of R15 by L15 and PS-L15 from *MENβ* SL+R15 complex. The gel images show dissociation of 5'-[<sup>32</sup>P]-radiolabeled R15 from SL+R15 complex as increasing amounts of L15 or PS+L15 are added.

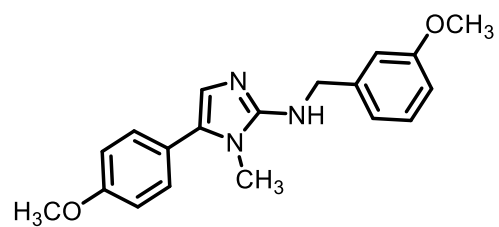

**Figure S3.** The chemical structure of compound **5**, a small molecule previously established to bind to the *MALAT1* triple helix [4].

## REFERENCES

1. Mitton-Fry, R.M.; DeGregorio, S.J.; Wang, J.; Steitz, T.A.; Steitz, J.A. Poly(A) Tail Recognition by a Viral RNA Element Through Assembly of a Triple Helix. *Science* **2010**, *330*, 1244–1247, doi:10.1126/science.1195858.
2. Torabi, S.-F.; Vaidya, A.T.; Tycowski, K.T.; DeGregorio, S.J.; Wang, J.; Shu, M.-D.; Steitz, T.A.; Steitz, J.A. RNA Stabilization by a Poly(A) Tail 3'-End Binding Pocket and Other Modes of Poly(A)-RNA Interaction. *Science* **2021**, *371*, eabe6523, doi:10.1126/science.abe6523.
3. Leontis, N.B.; Westhof, E. Geometric Nomenclature and Classification of RNA Base Pairs. *RNA N. Y. N* **2001**, *7*, 499–512, doi:10.1017/s1355838201002515.
4. Abulwerdi, F.A.; Xu, W.; Ageeli, A.A.; Yonkunas, M.J.; Arun, G.; Nam, H.; Schneekloth, J.S.Jr.; Dayie, T.K.; Spector, D.; Baird, N.; et al. Selective Small-Molecule Targeting of a Triple Helix Encoded by the Long Noncoding RNA, MALAT1. *ACS Chem. Biol.* **2019**, *14*, 223–235, doi:10.1021/acschembio.8b00807.
